# Supplementary material for: Changes in composition of spider orb web sticky droplets with starvation and web removal, and synthesis of sticky droplet compounds
Source: Oxford University Press journal article supplement (doi:10.1242/jeb.02147), 2006-03-30
Supplement: jeb02147-sup-figs2.pdf [file jeb02147-sup-figs2.pdf]

*Araneus  
cavaticus*

*Argiope  
aurantia*

*Argiope  
trifasciata*

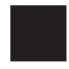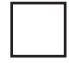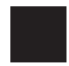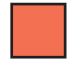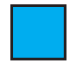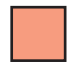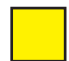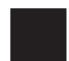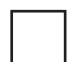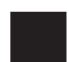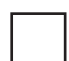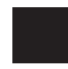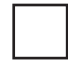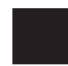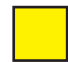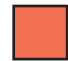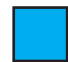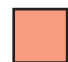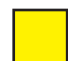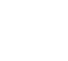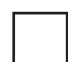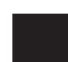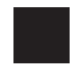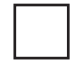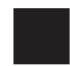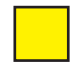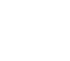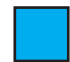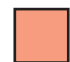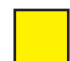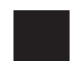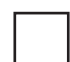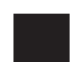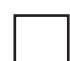

H<sub>2</sub>PO<sub>4</sub><sup>-</sup>

Isethionate

N-Acetyltaurine

Taurine

Proline

Alanine

Glycine

Glycine Betaine

N-Acetylputrescine

GABamide

Choline

Putrescine

Negatively Charged

Net Neutral

Positively Charged
