# Supplementary figures and images for: Changes in composition of spider orb web sticky droplets with starvation and web removal, and synthesis of sticky droplet compounds
Source: Oxford University Press journal article supplement (doi:10.1242/jeb.02147), 2006-03-30

*Araneus cavaticus*

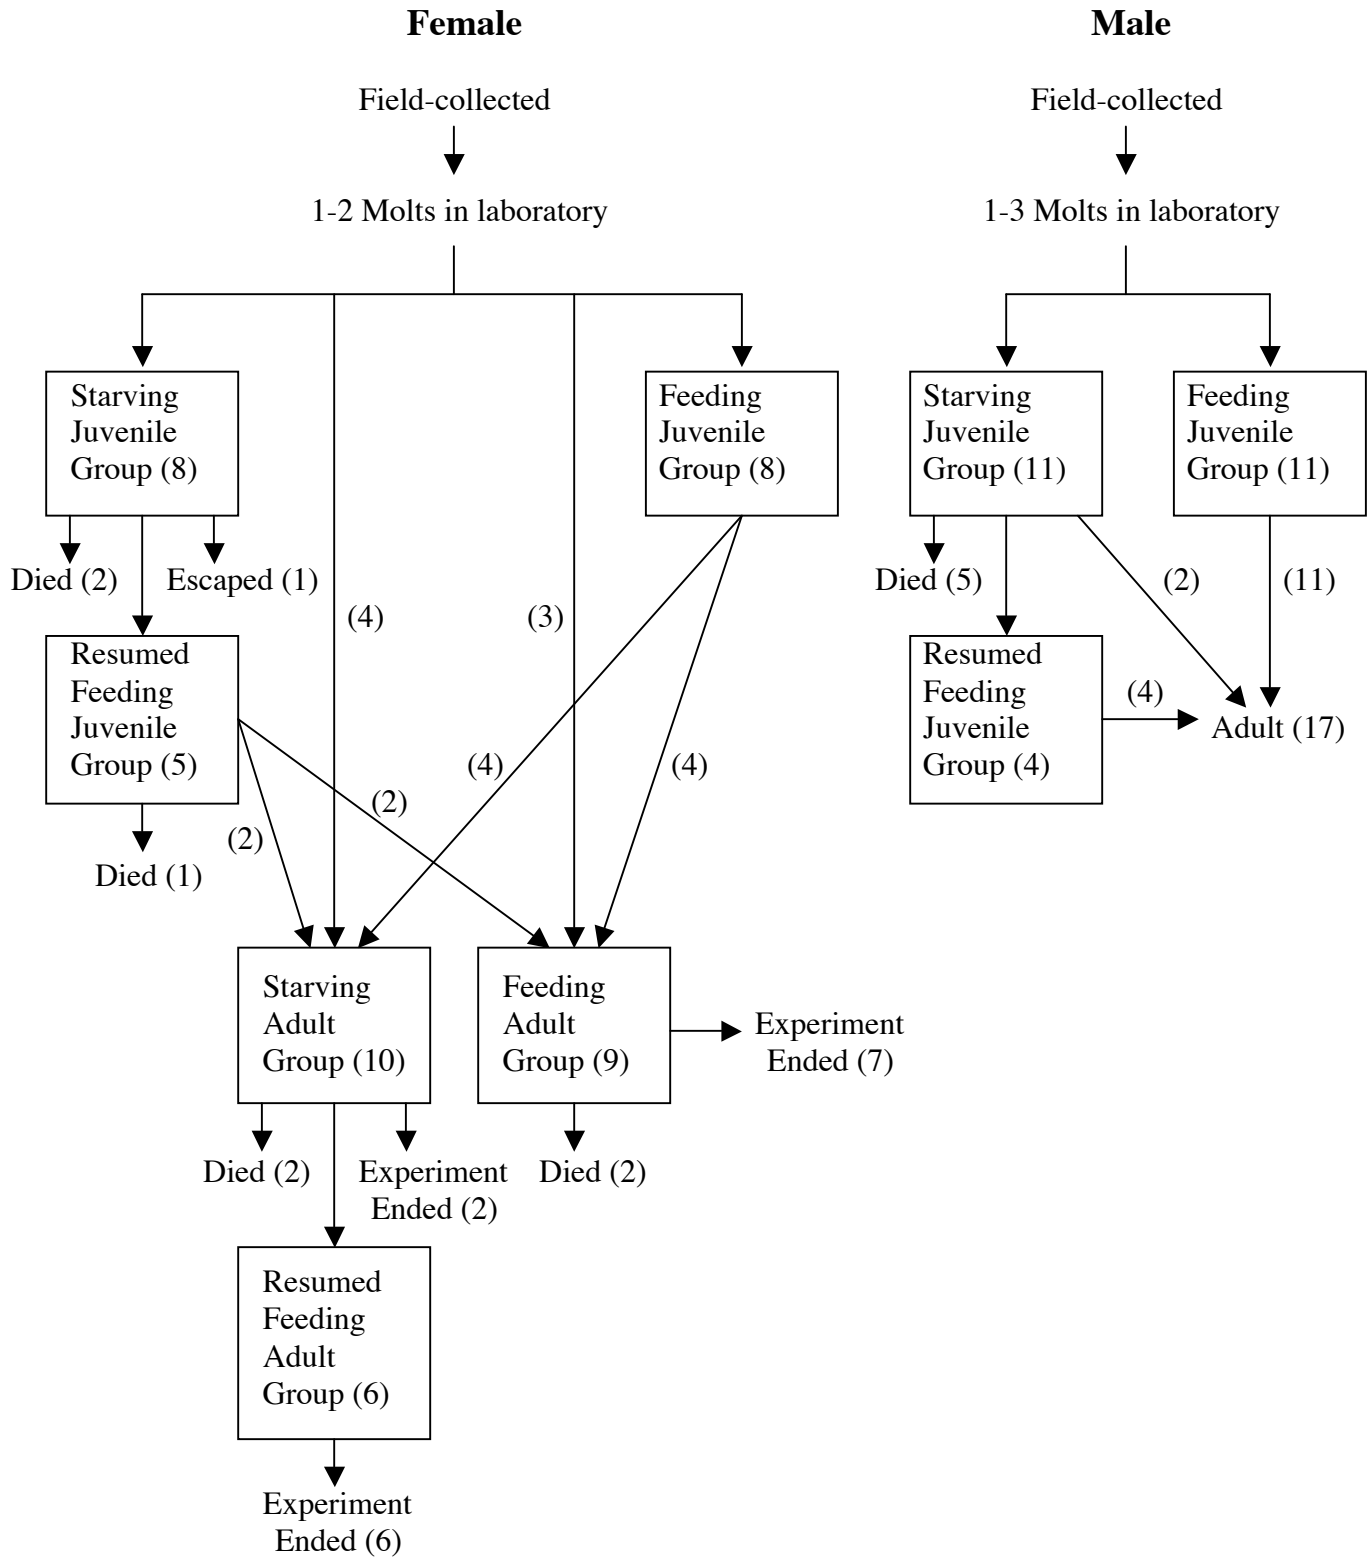

# *Argiope aurantia*

## Female

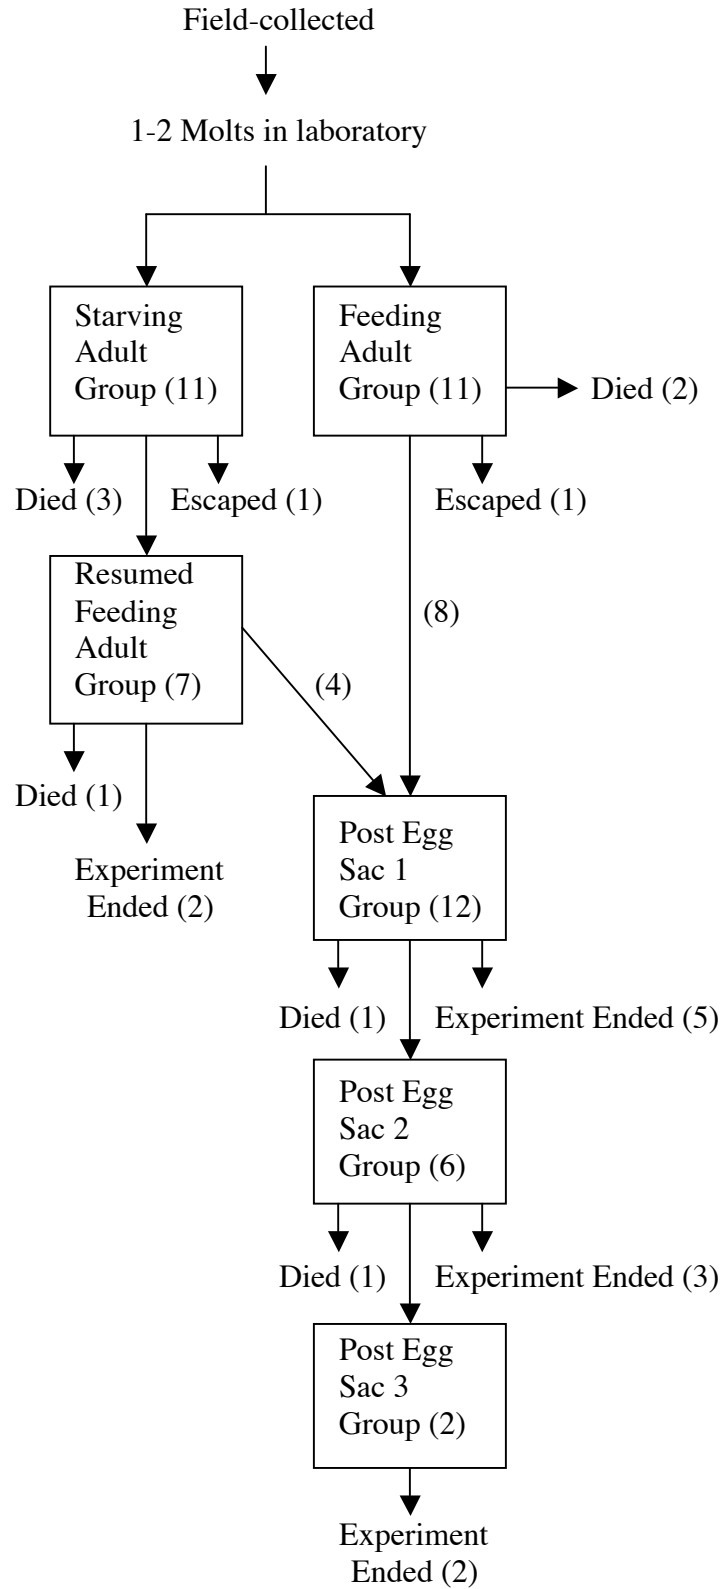

# *Argiope trifasciata*

## Female

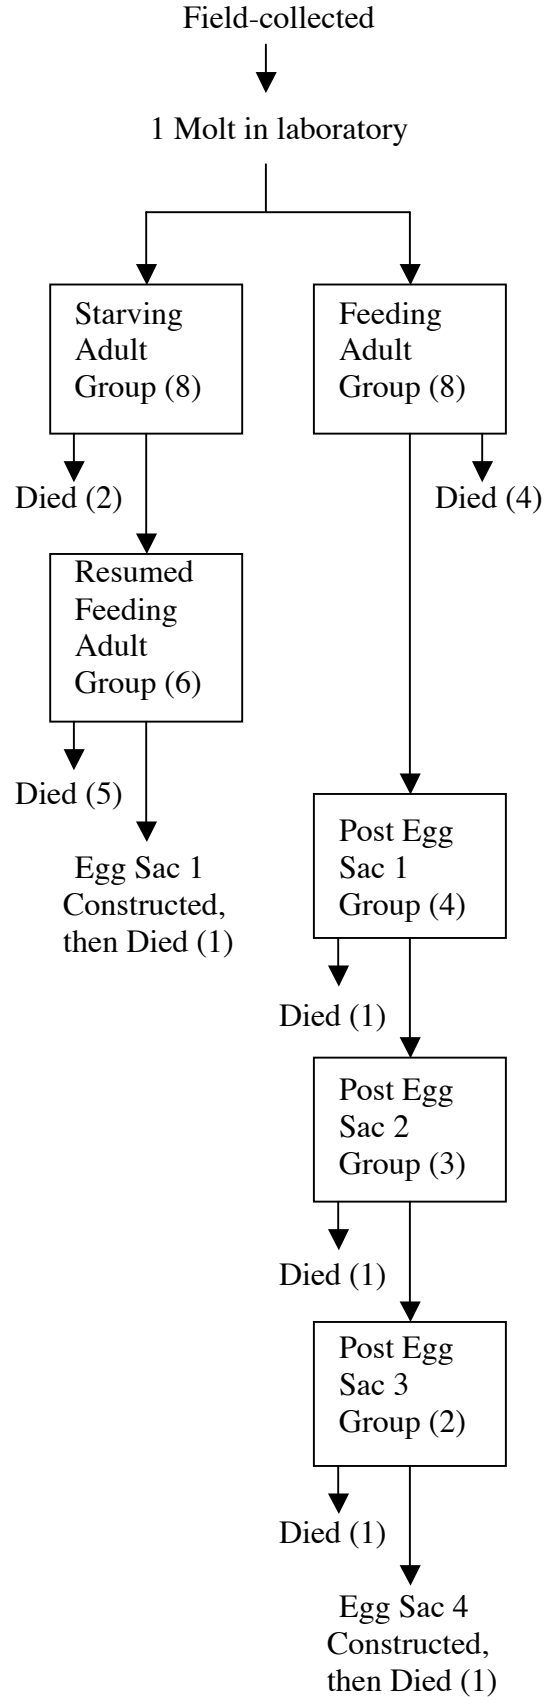

Supplement: jeb02147-sup-figs1.pdf [file jeb02147-sup-figs1.pdf]

# Webs of *Araneus cavaticus* Juvenile Males

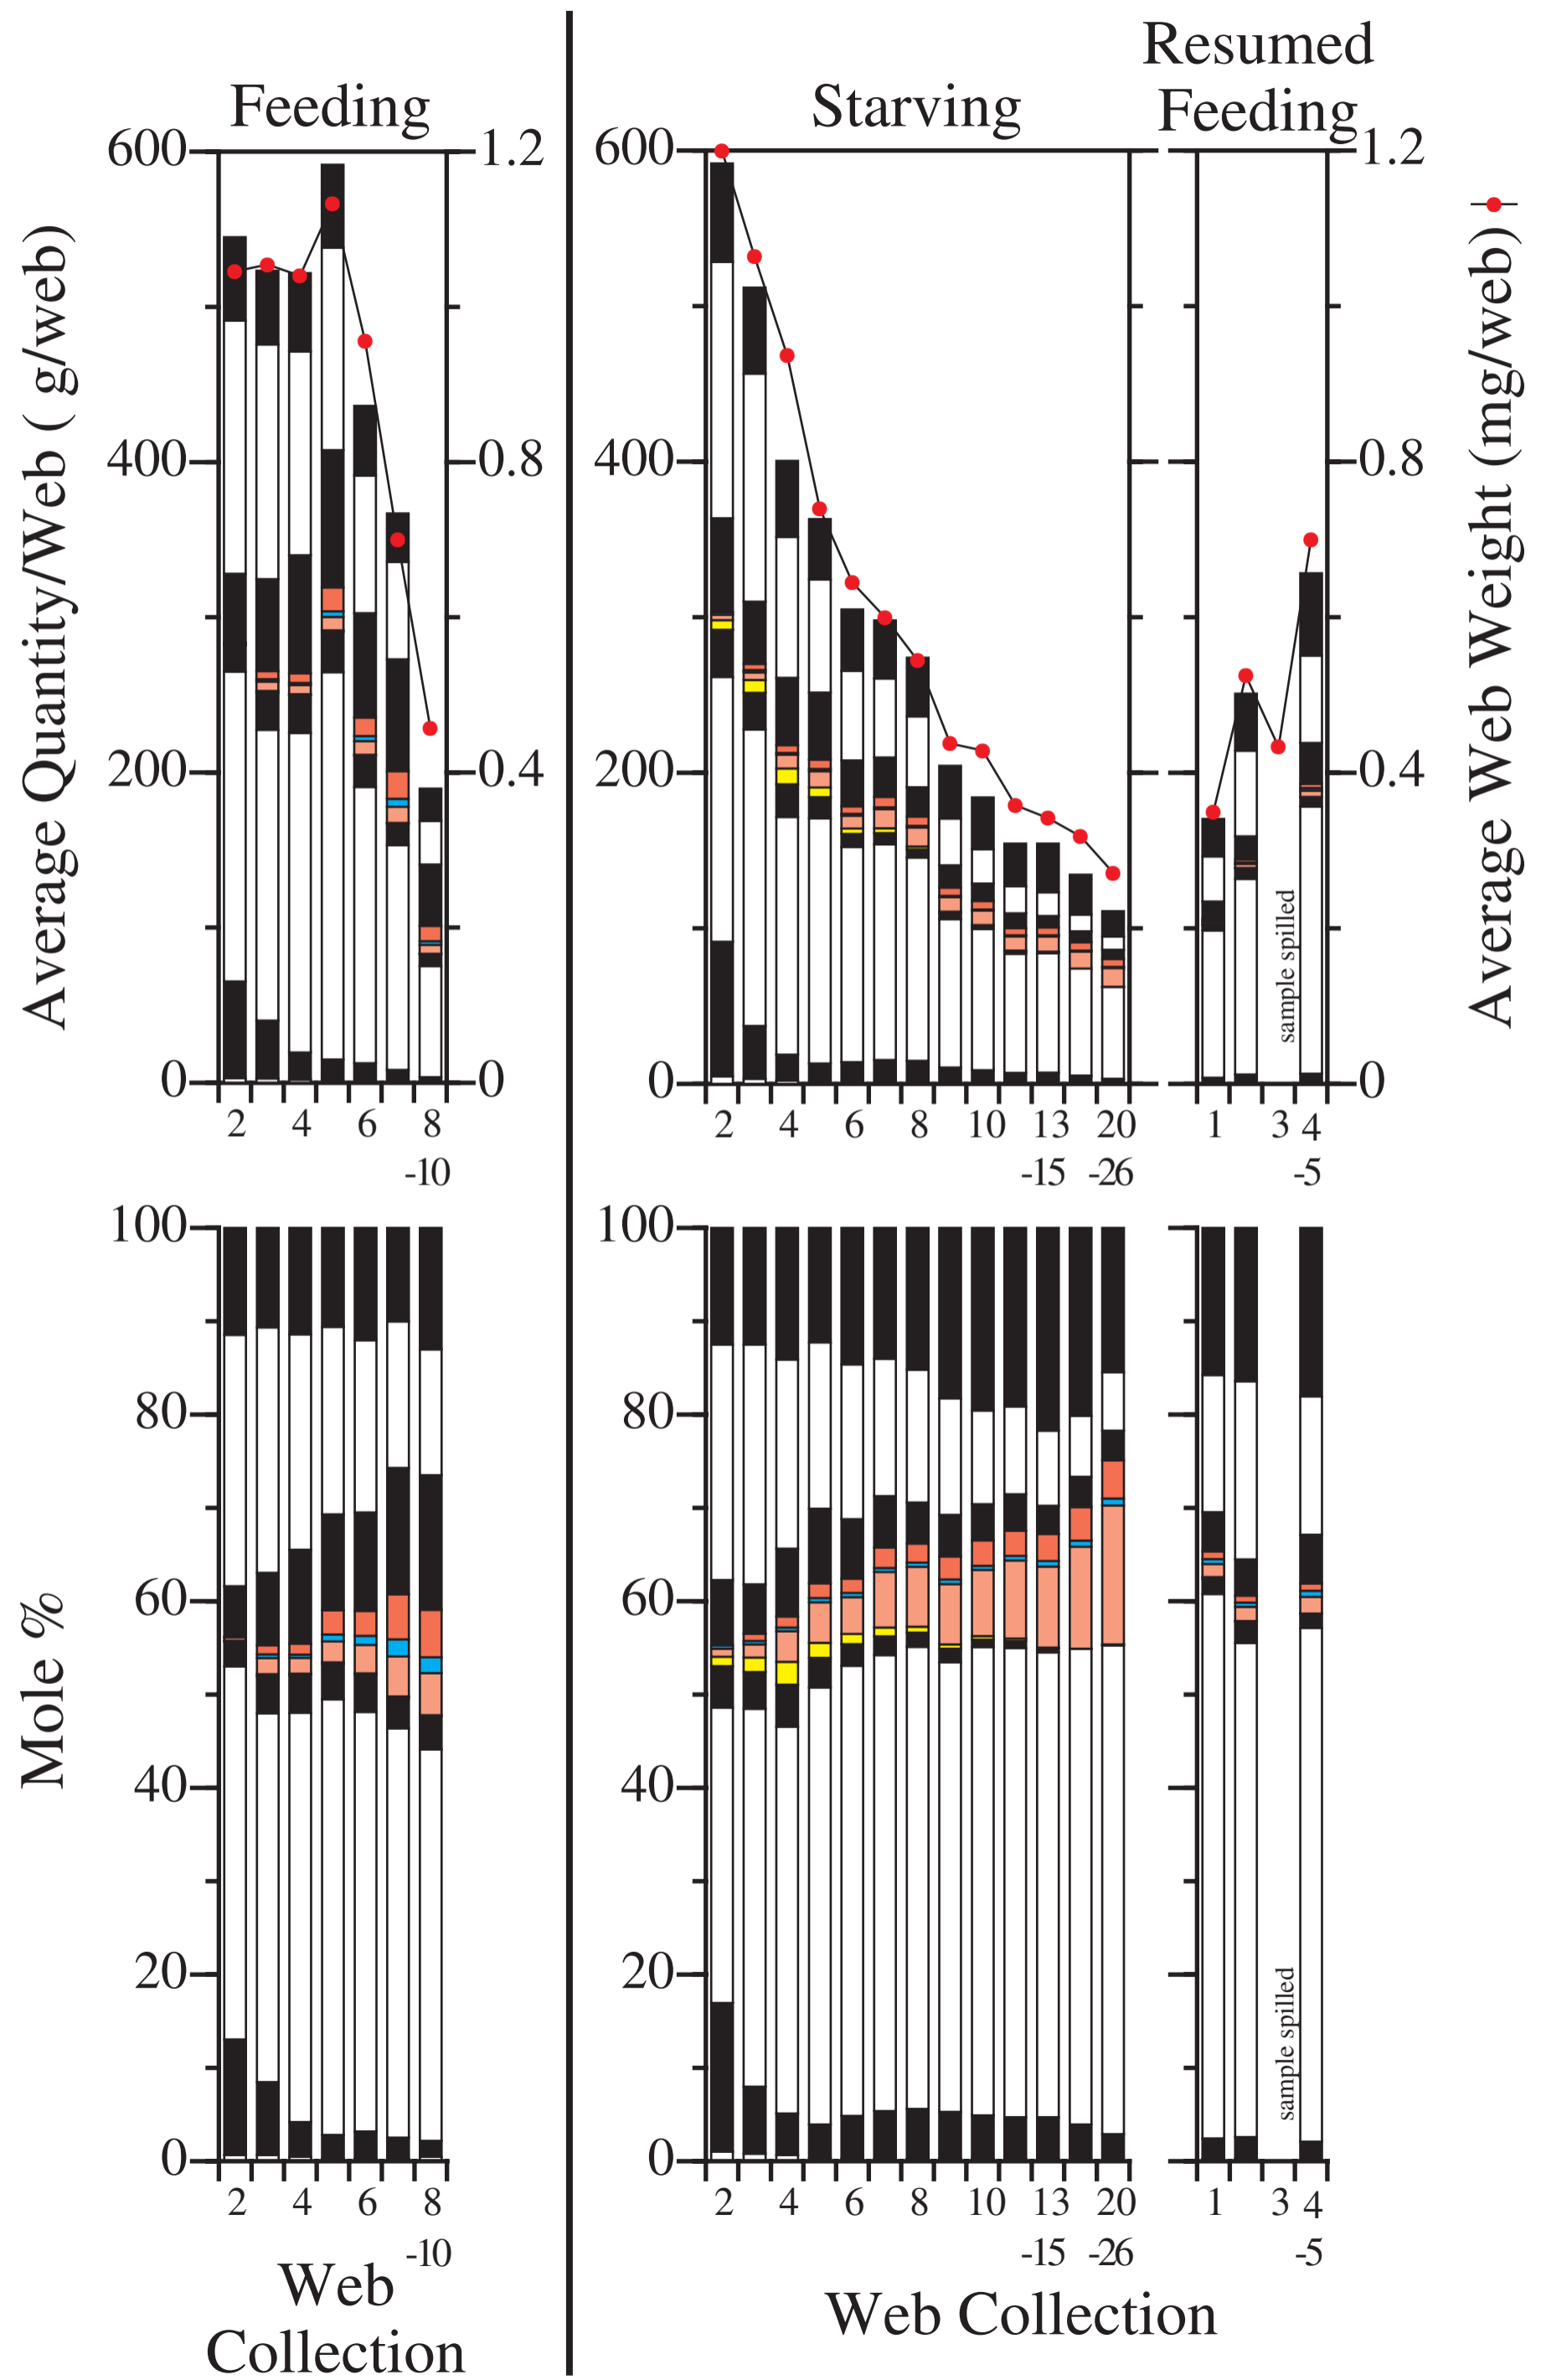

Supplement: jeb02147-sup-figs3.pdf [file jeb02147-sup-figs3.pdf]

# Webs of *Araneus cavaticus* Juvenile Females

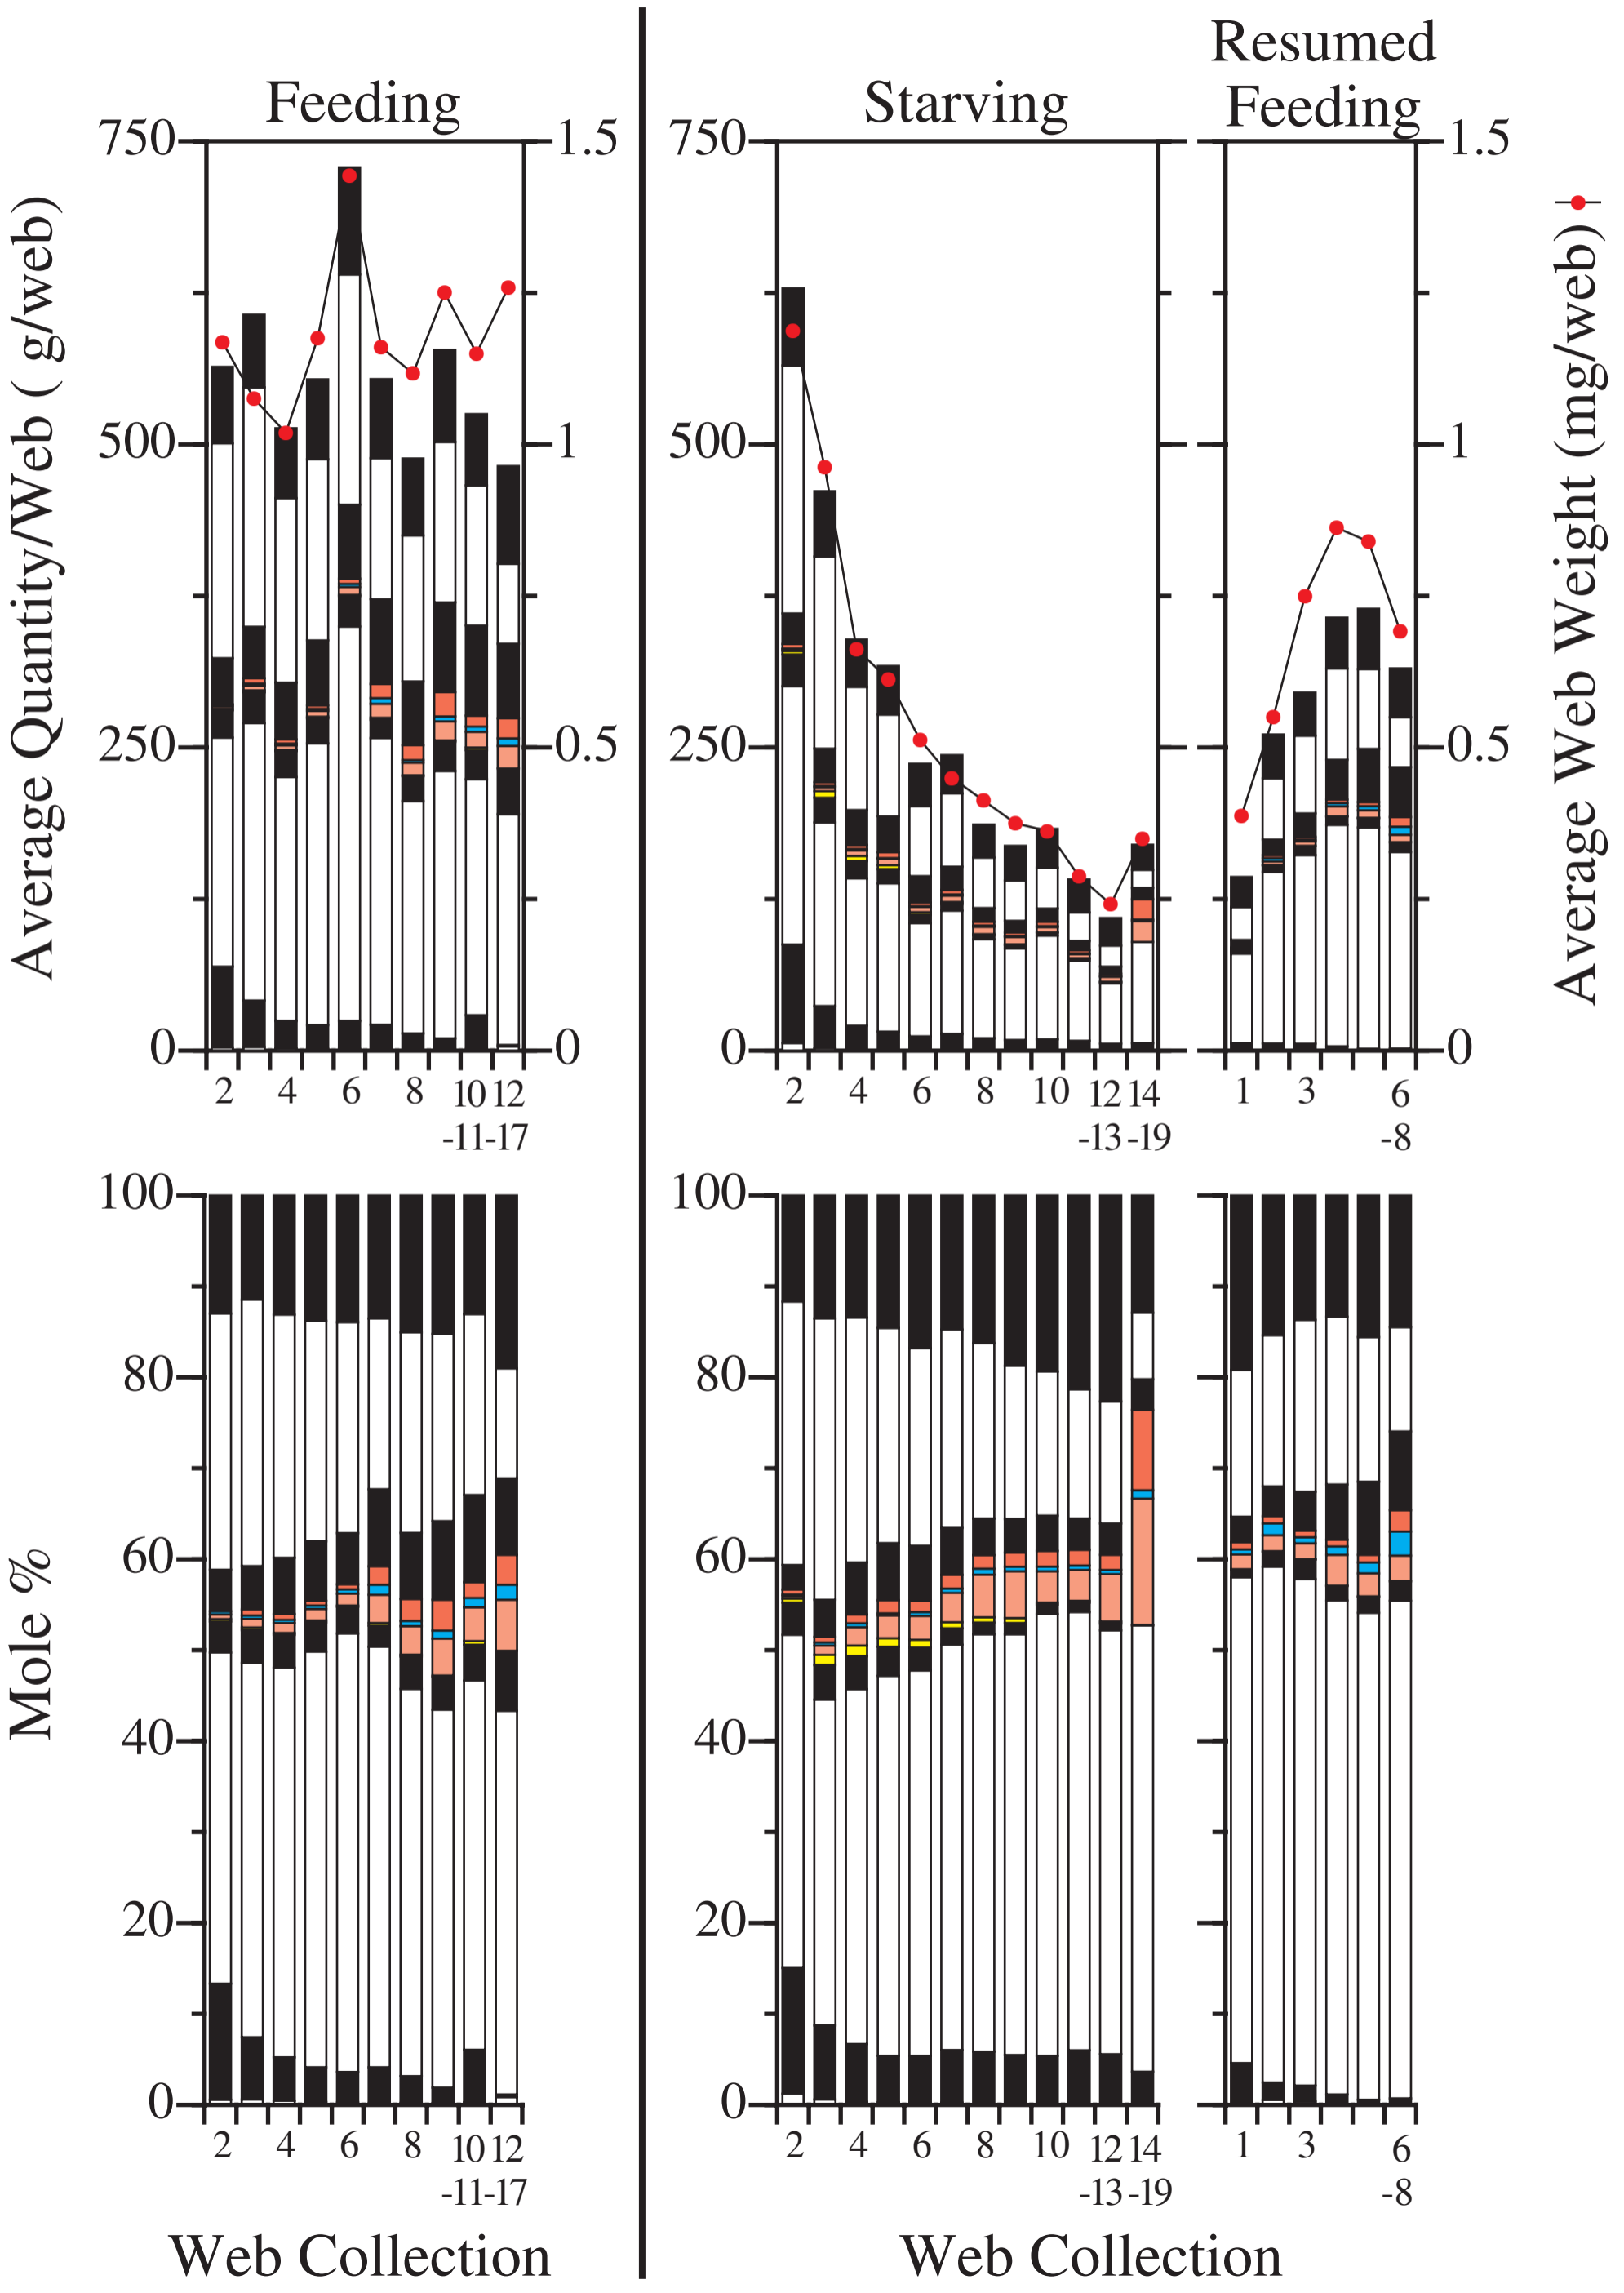

Supplement: jeb02147-sup-figs4.pdf [file jeb02147-sup-figs4.pdf]

# Webs of *Araneus cavaticus* Adult Females

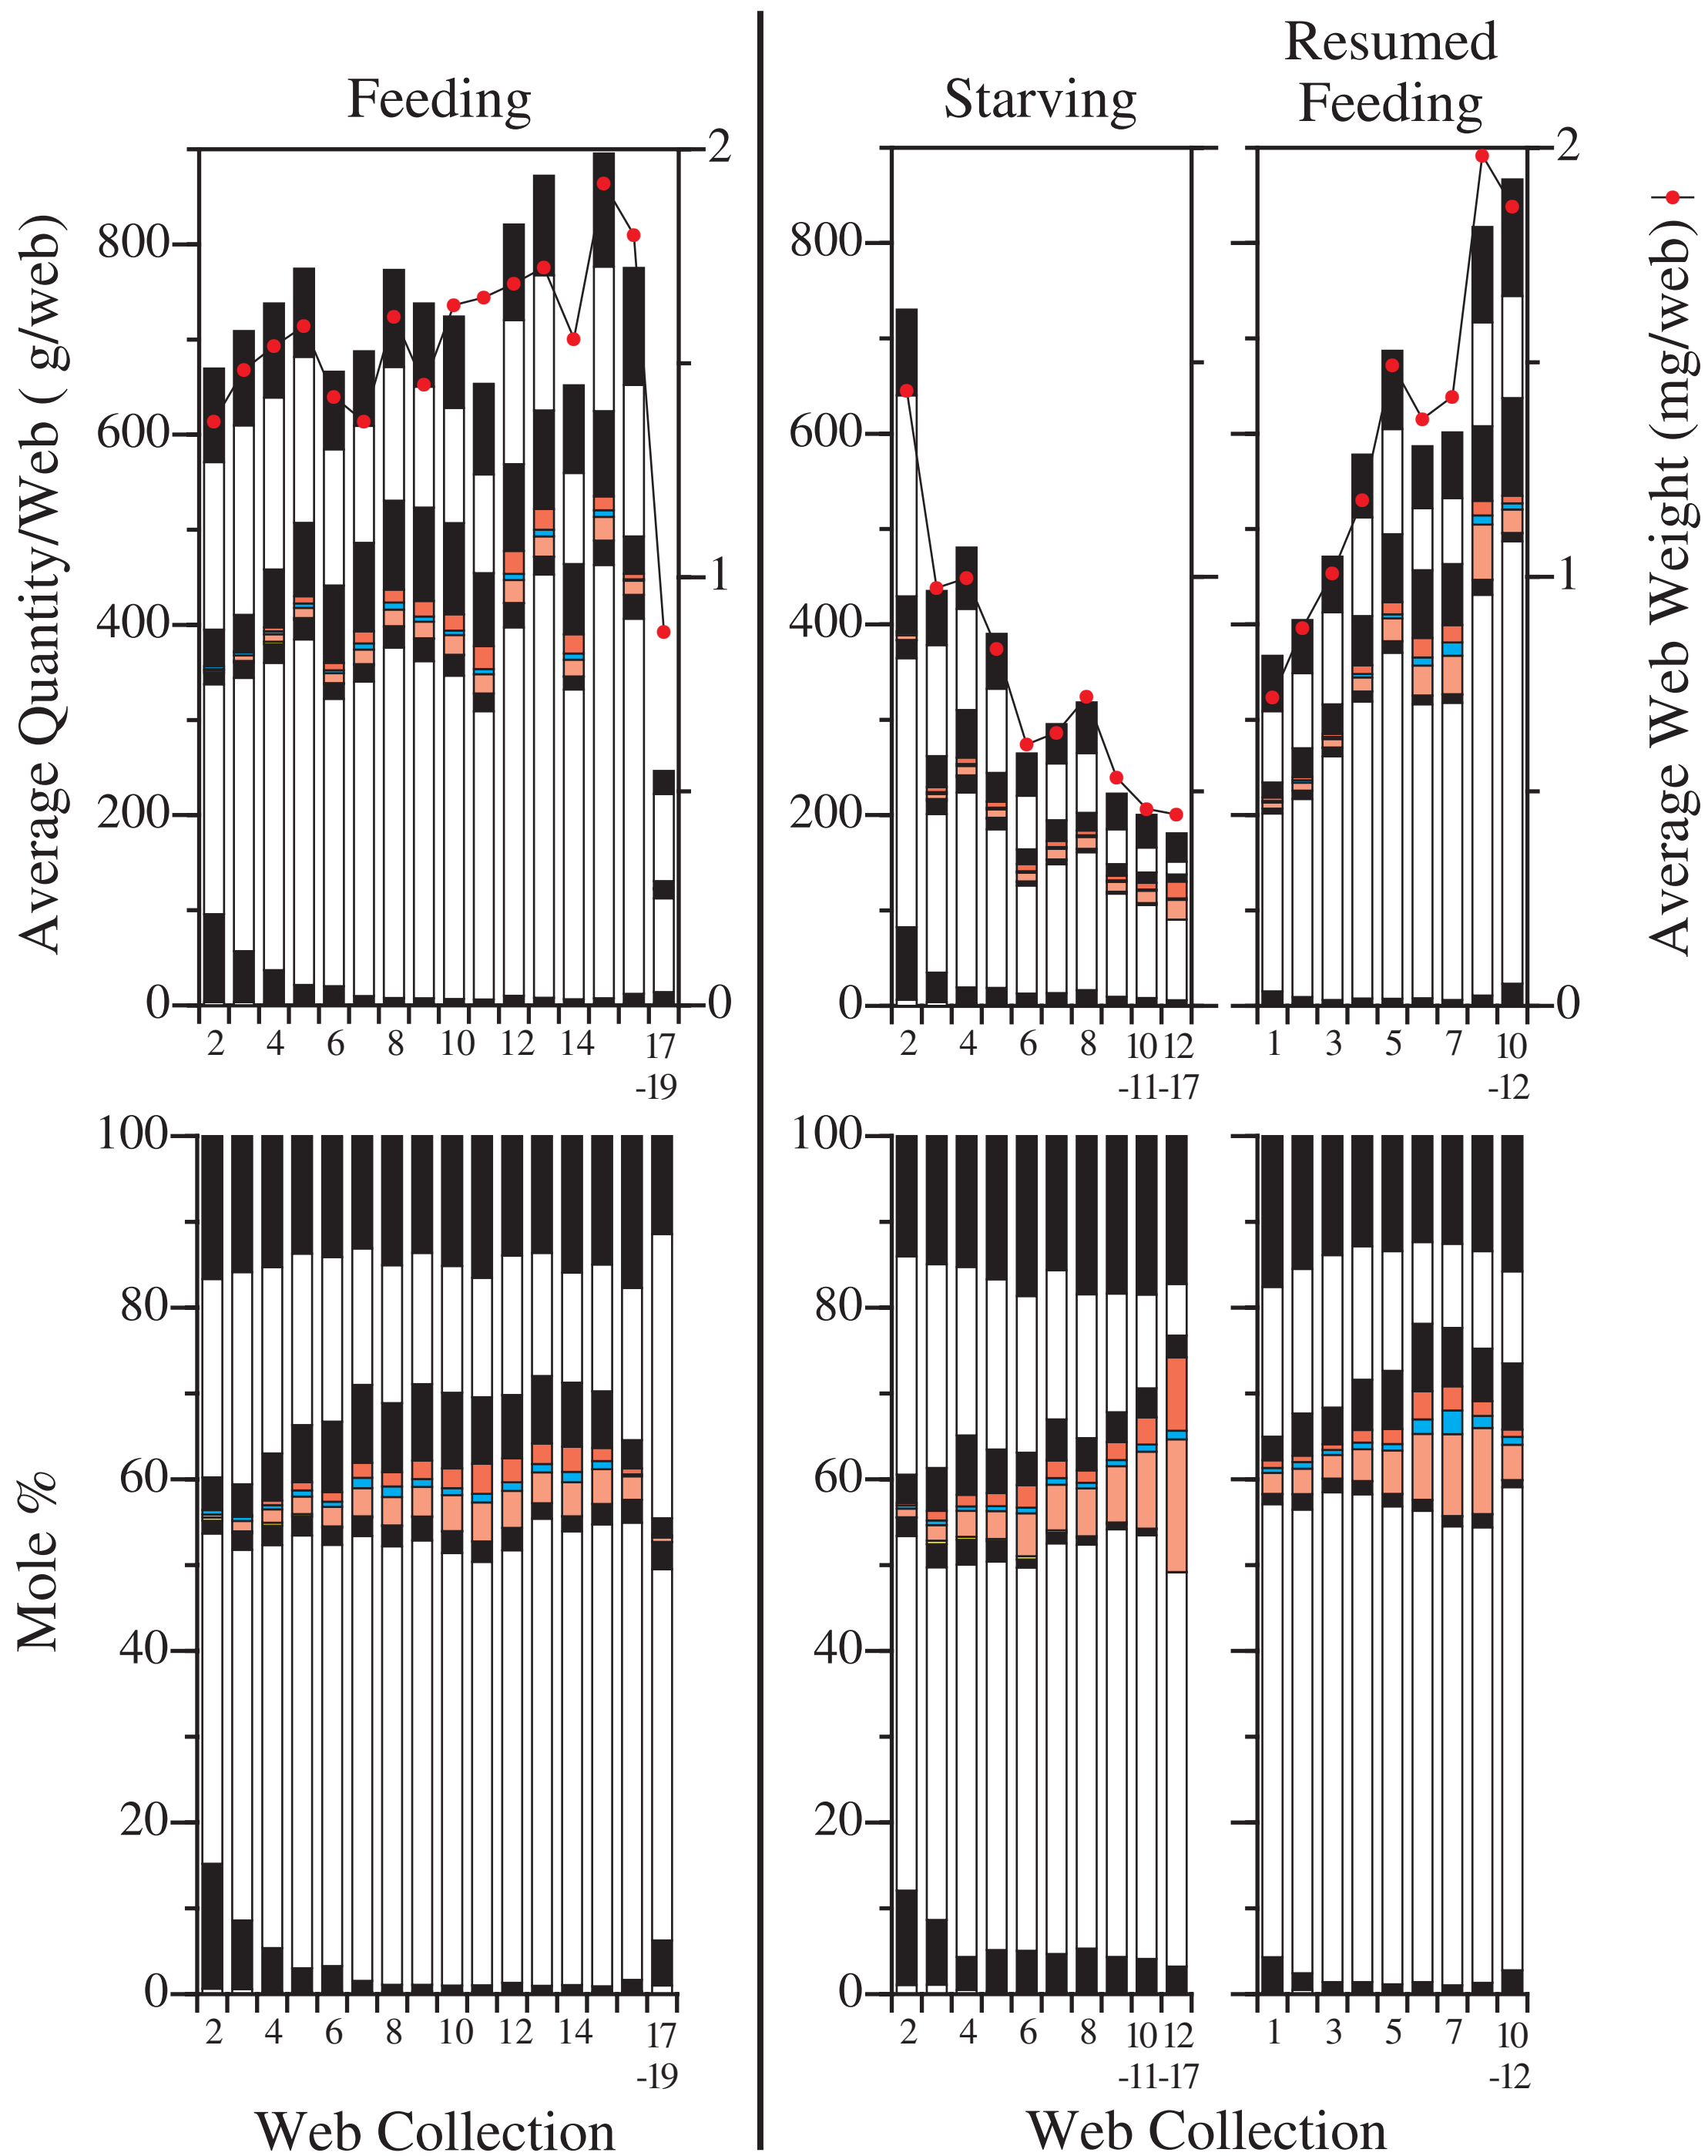

Supplement: jeb02147-sup-figs5.pdf [file jeb02147-sup-figs5.pdf]

# Webs of *Argiope aurantia* Adult Females

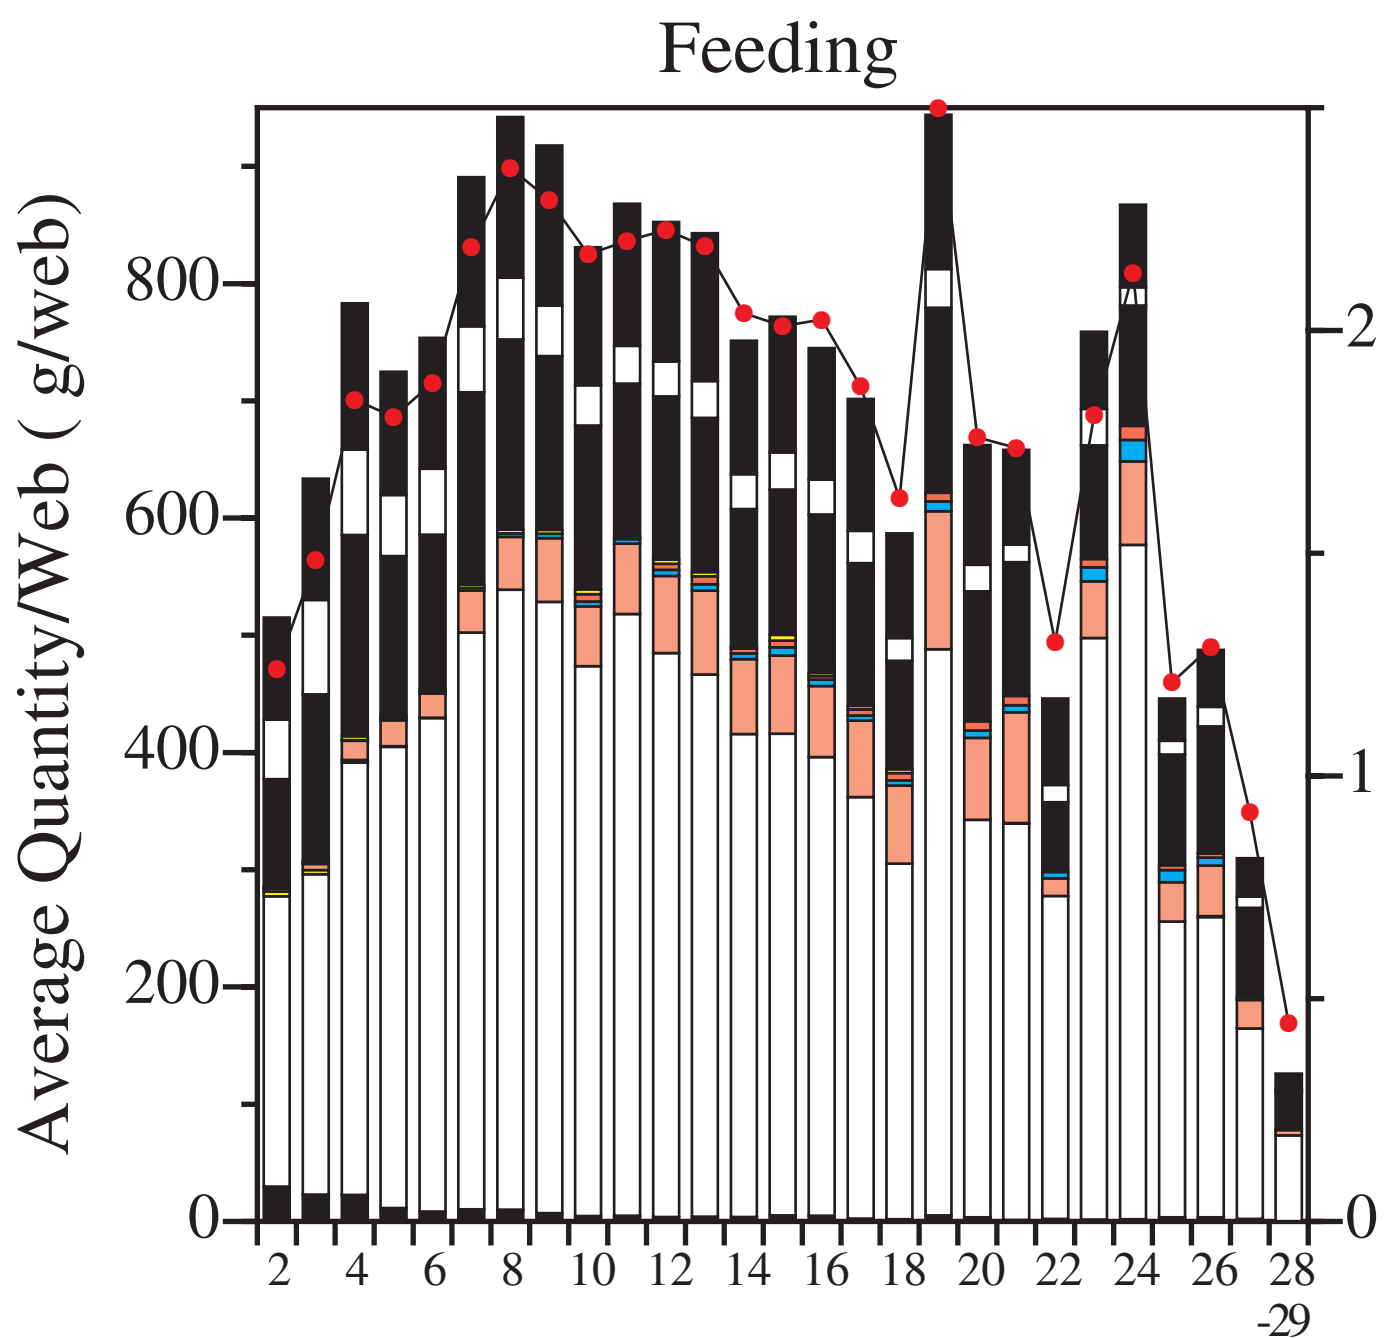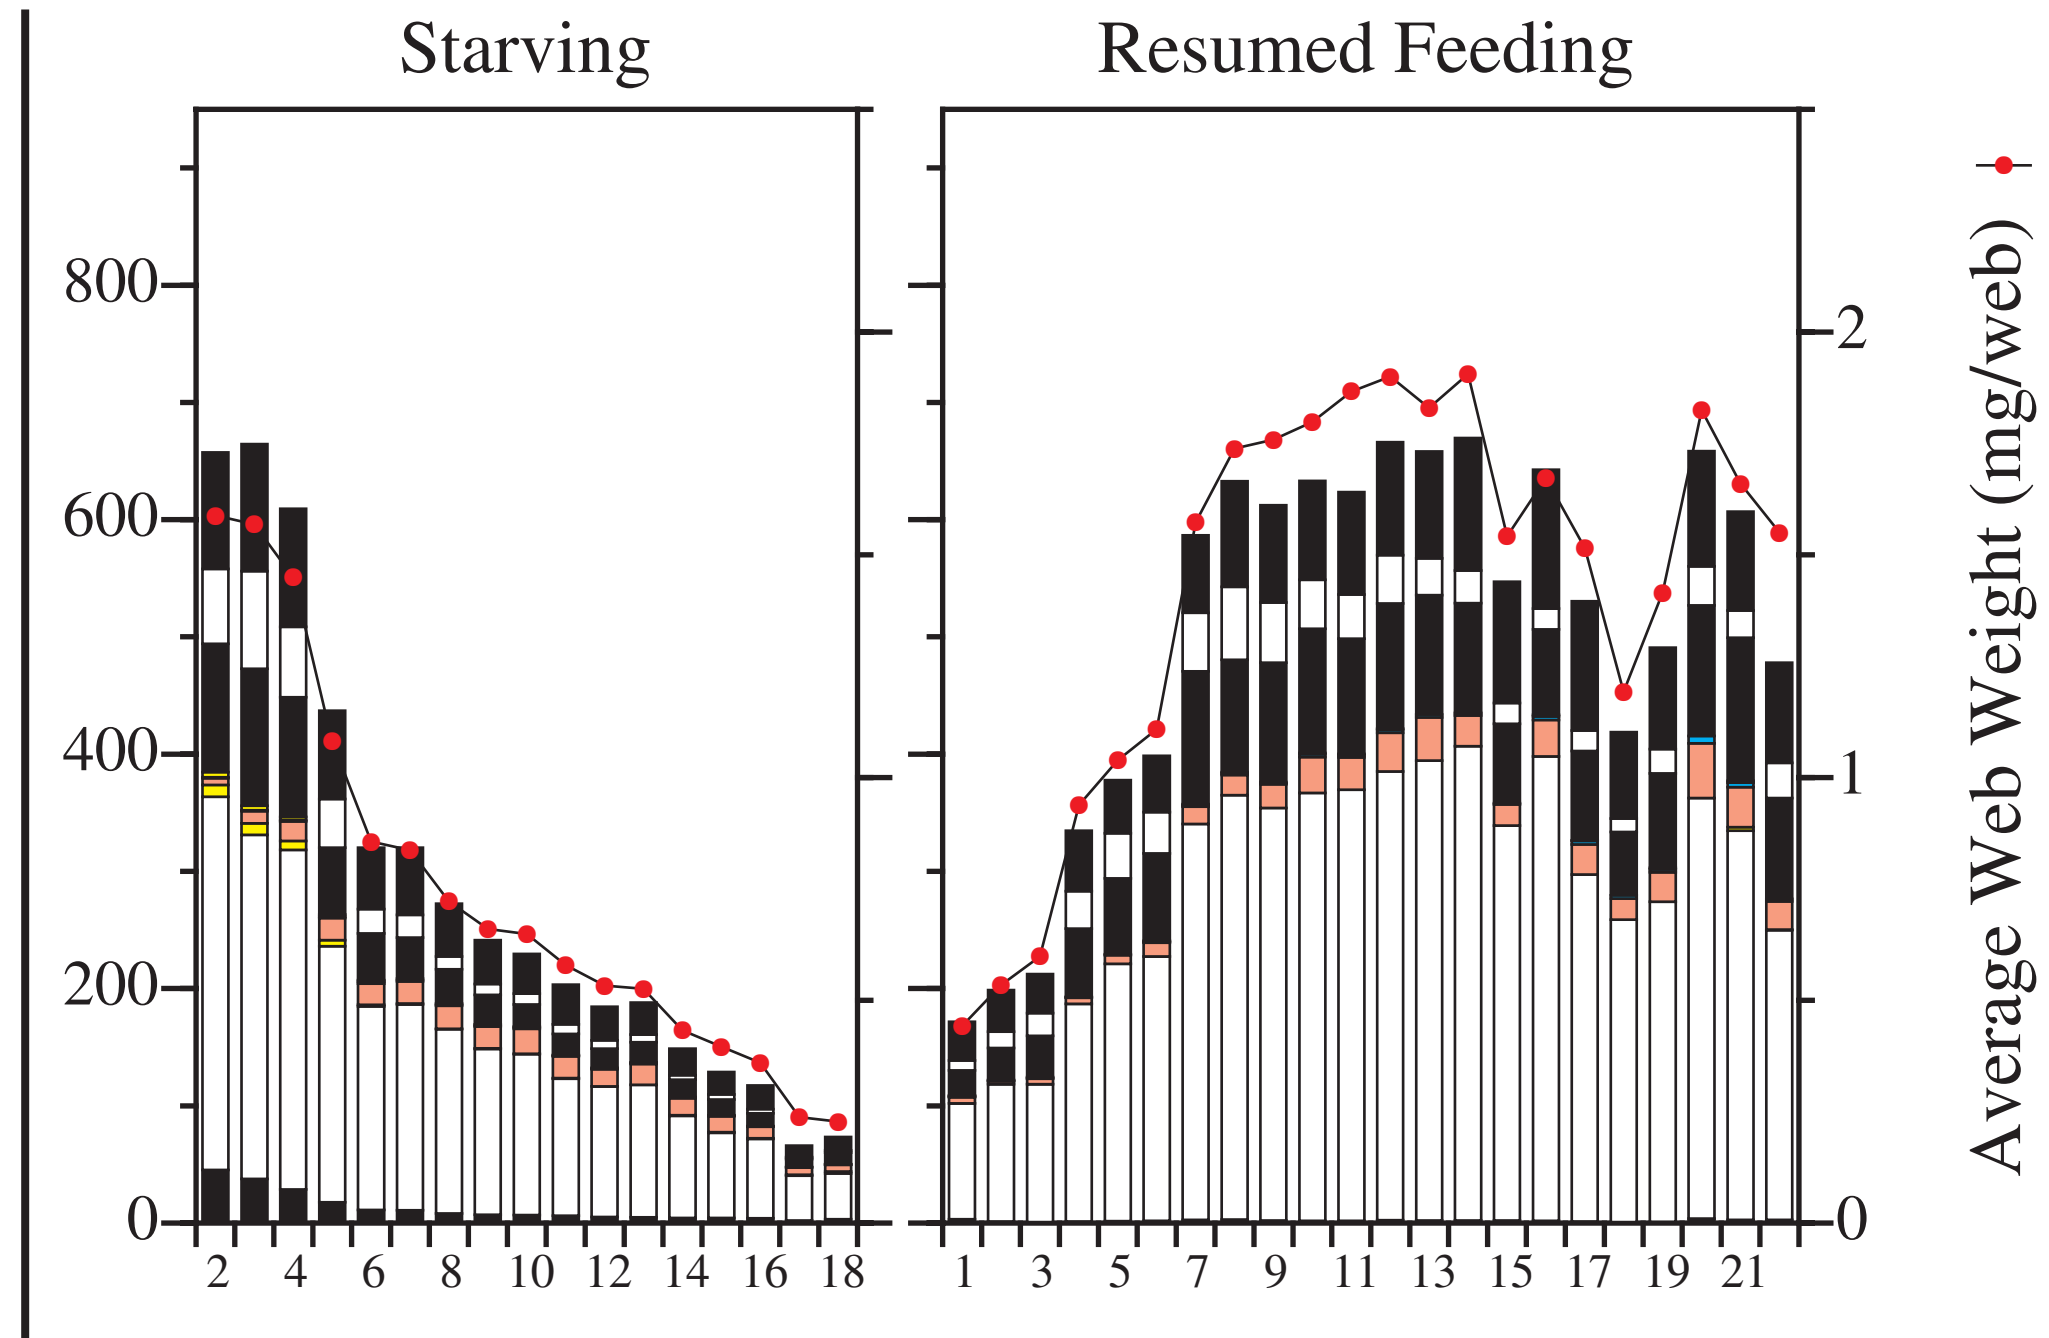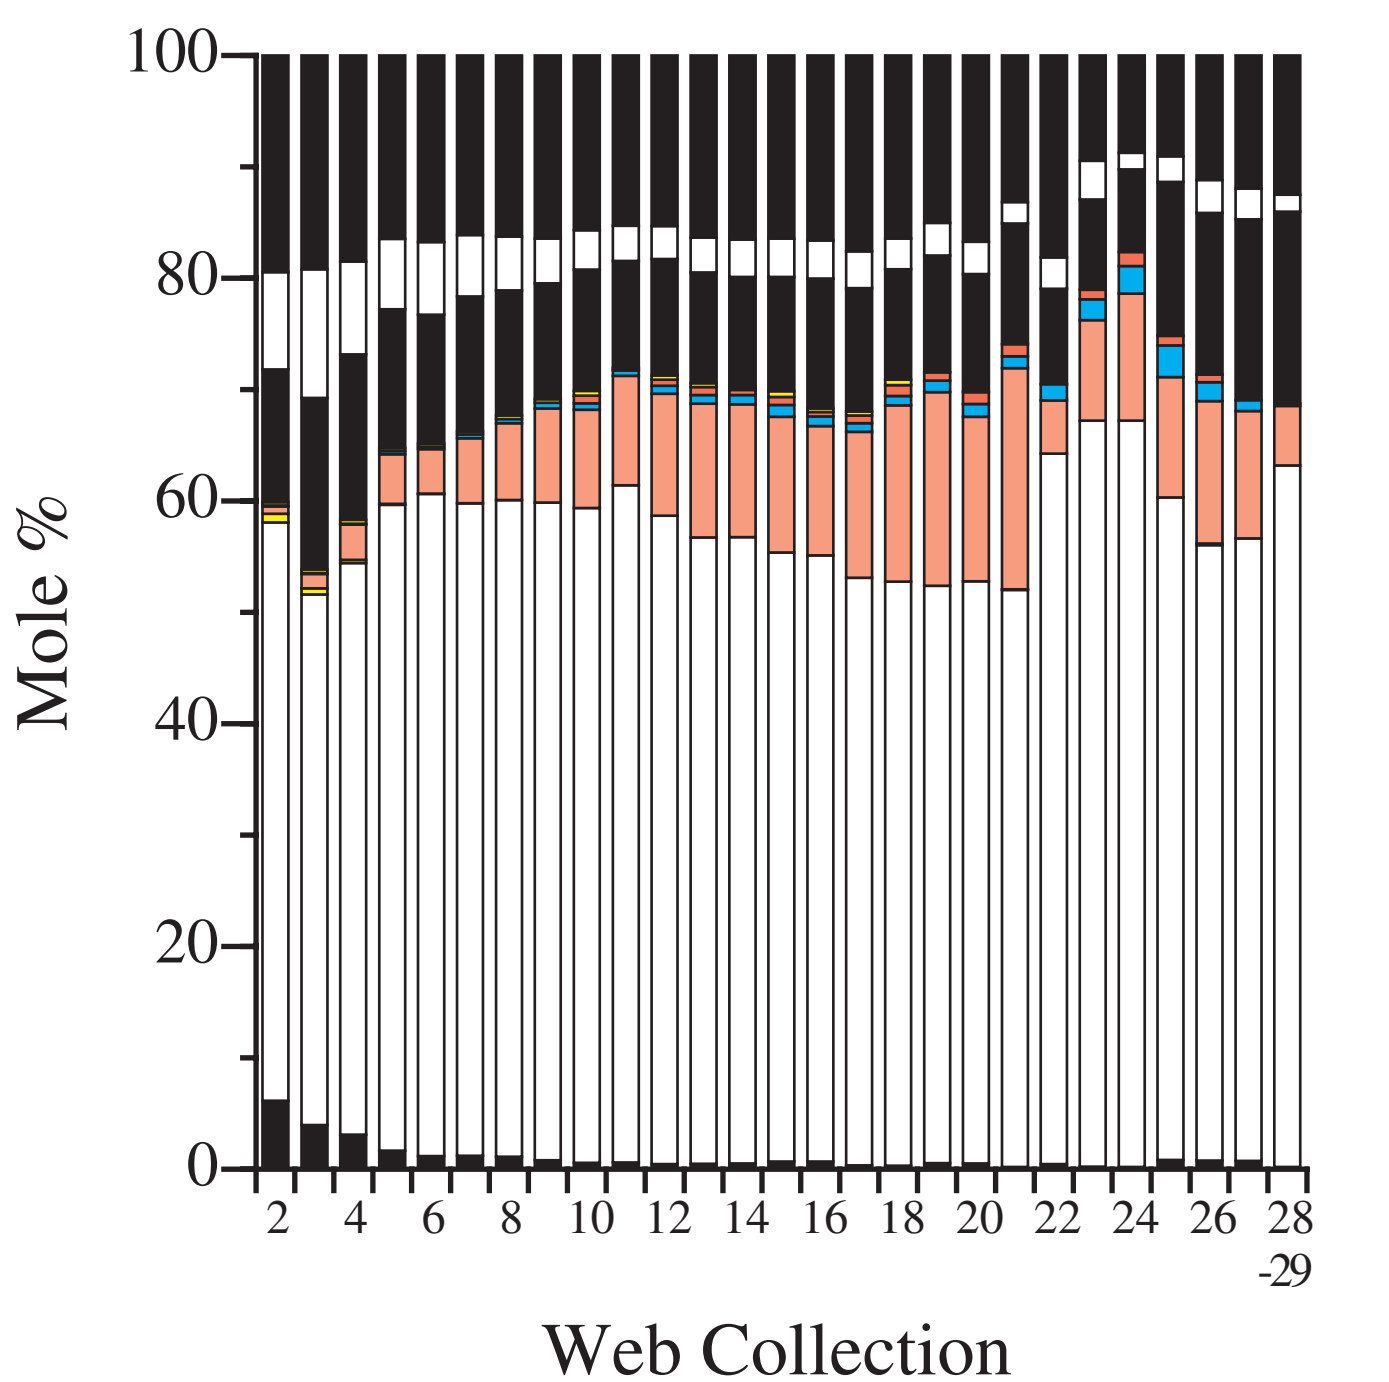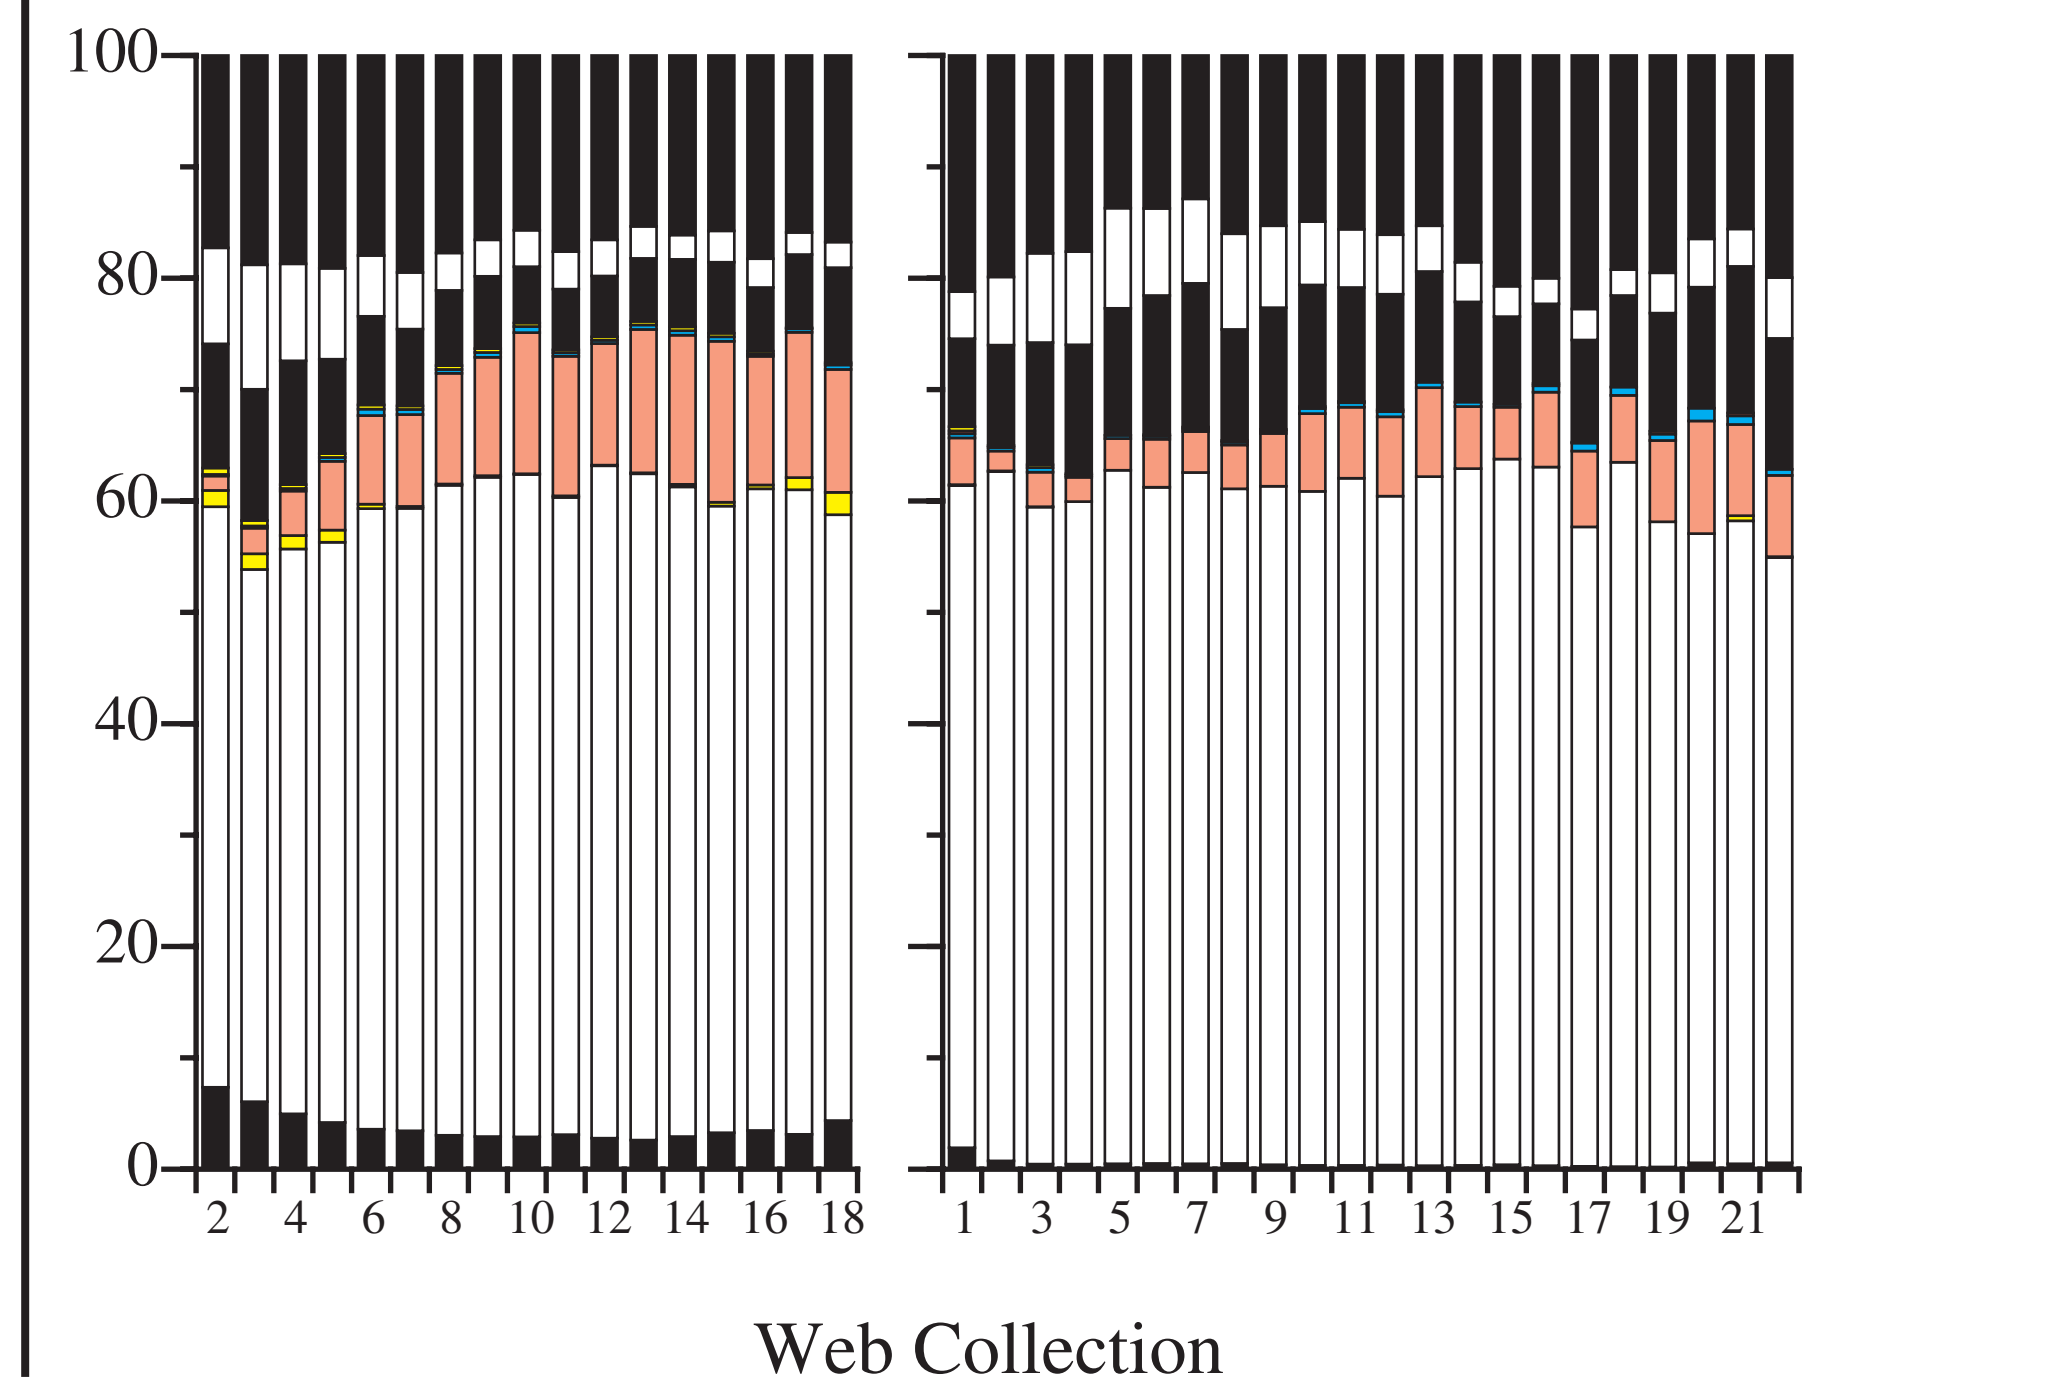

Supplement: jeb02147-sup-figs6.pdf [file jeb02147-sup-figs6.pdf]

# *Argiope aurantia*

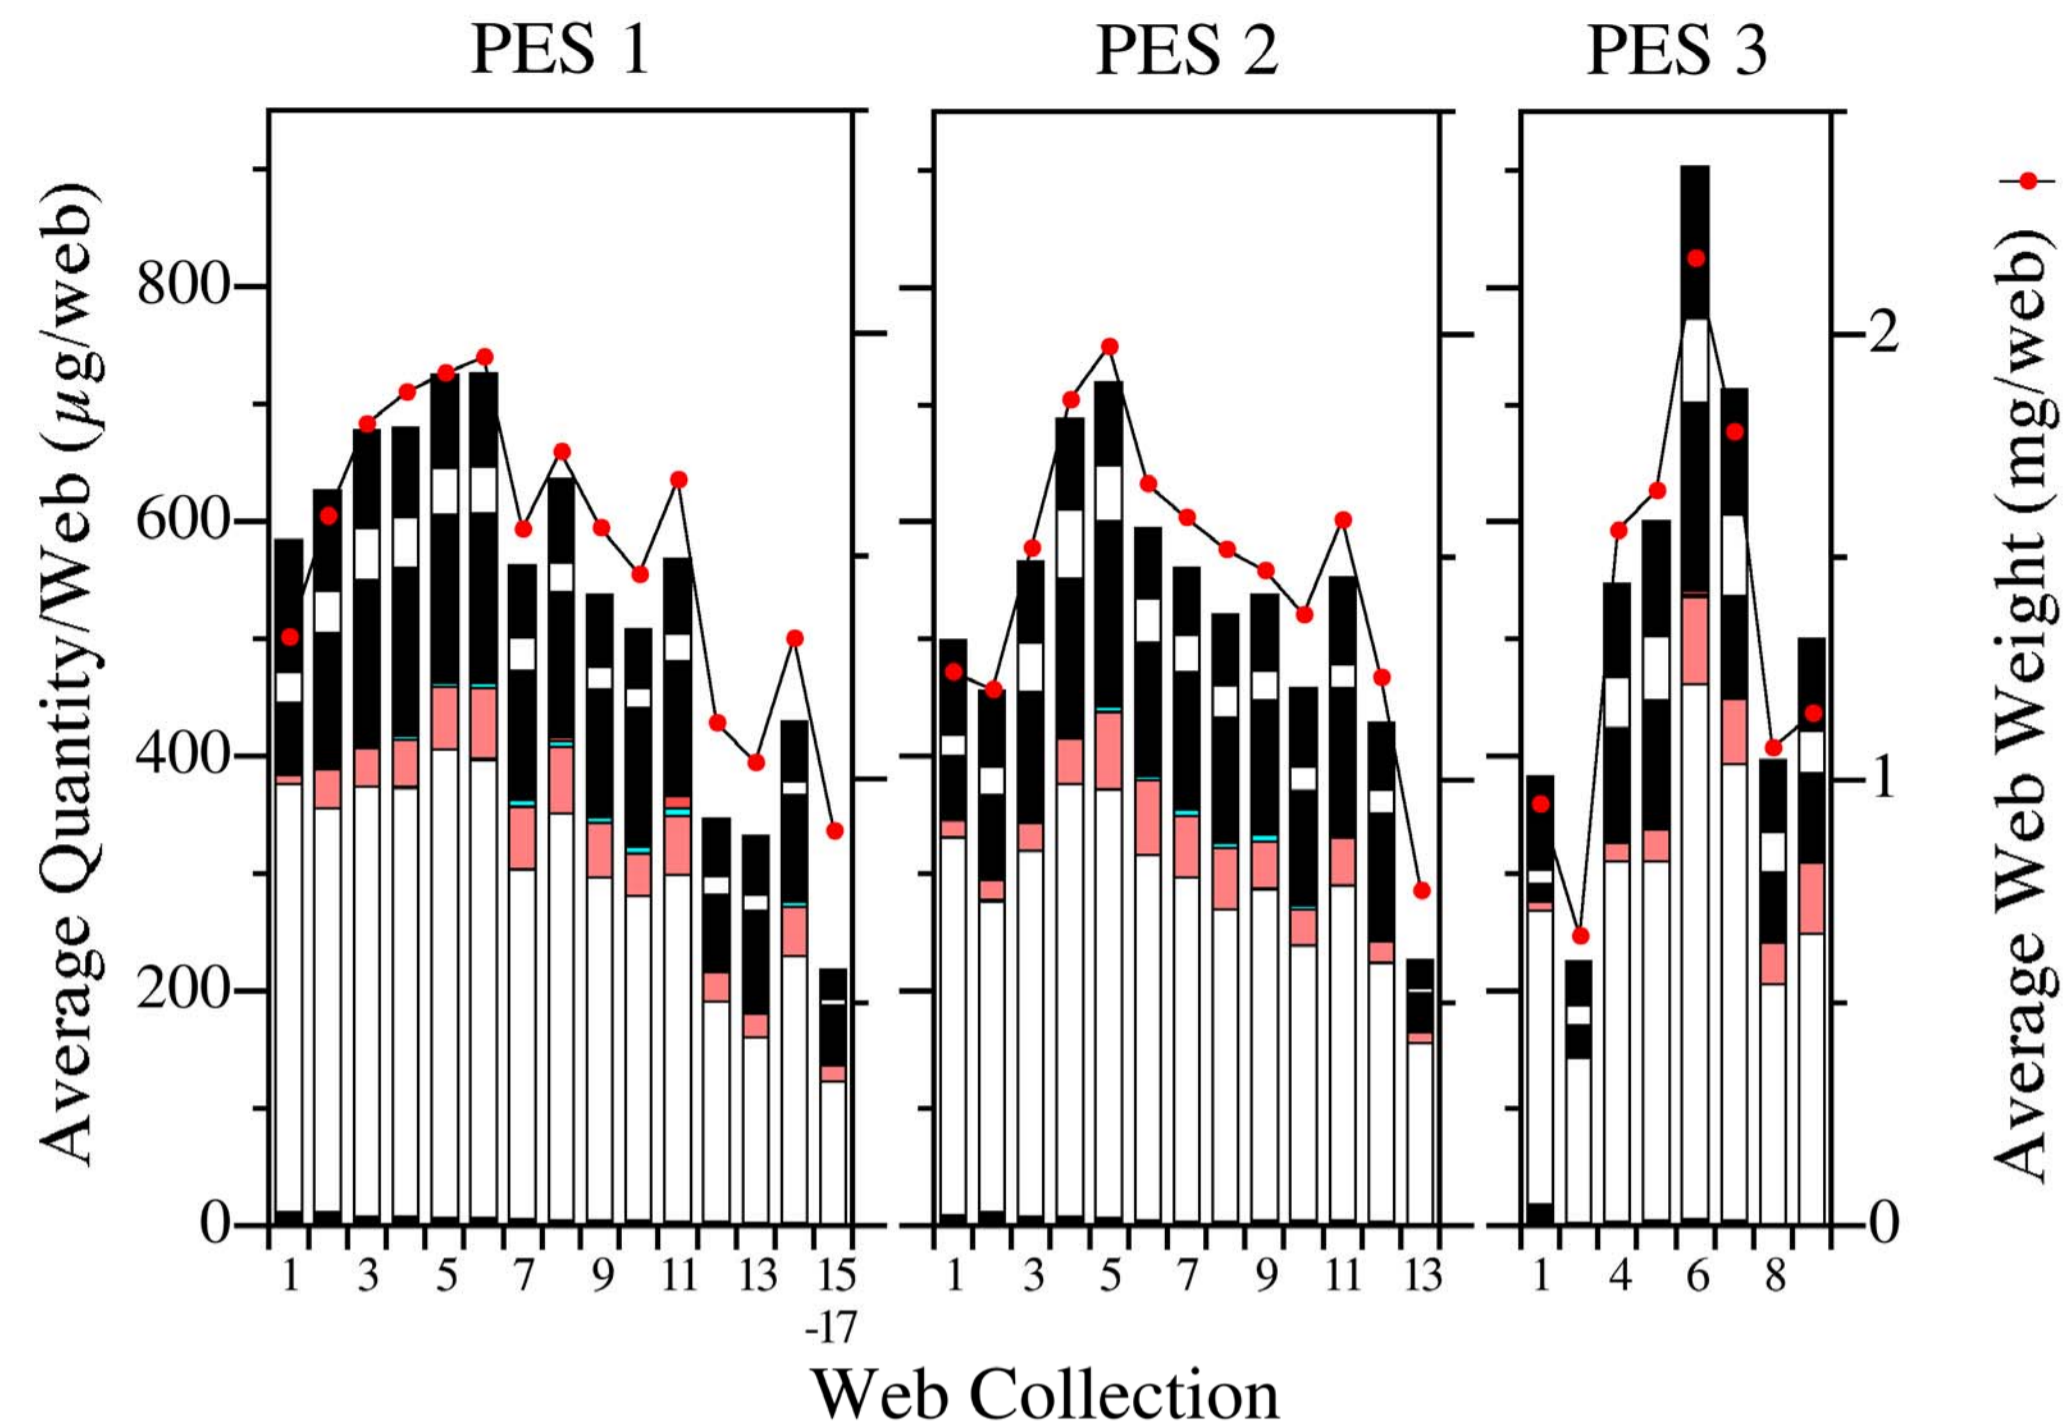

# *Argiope trifasciata*

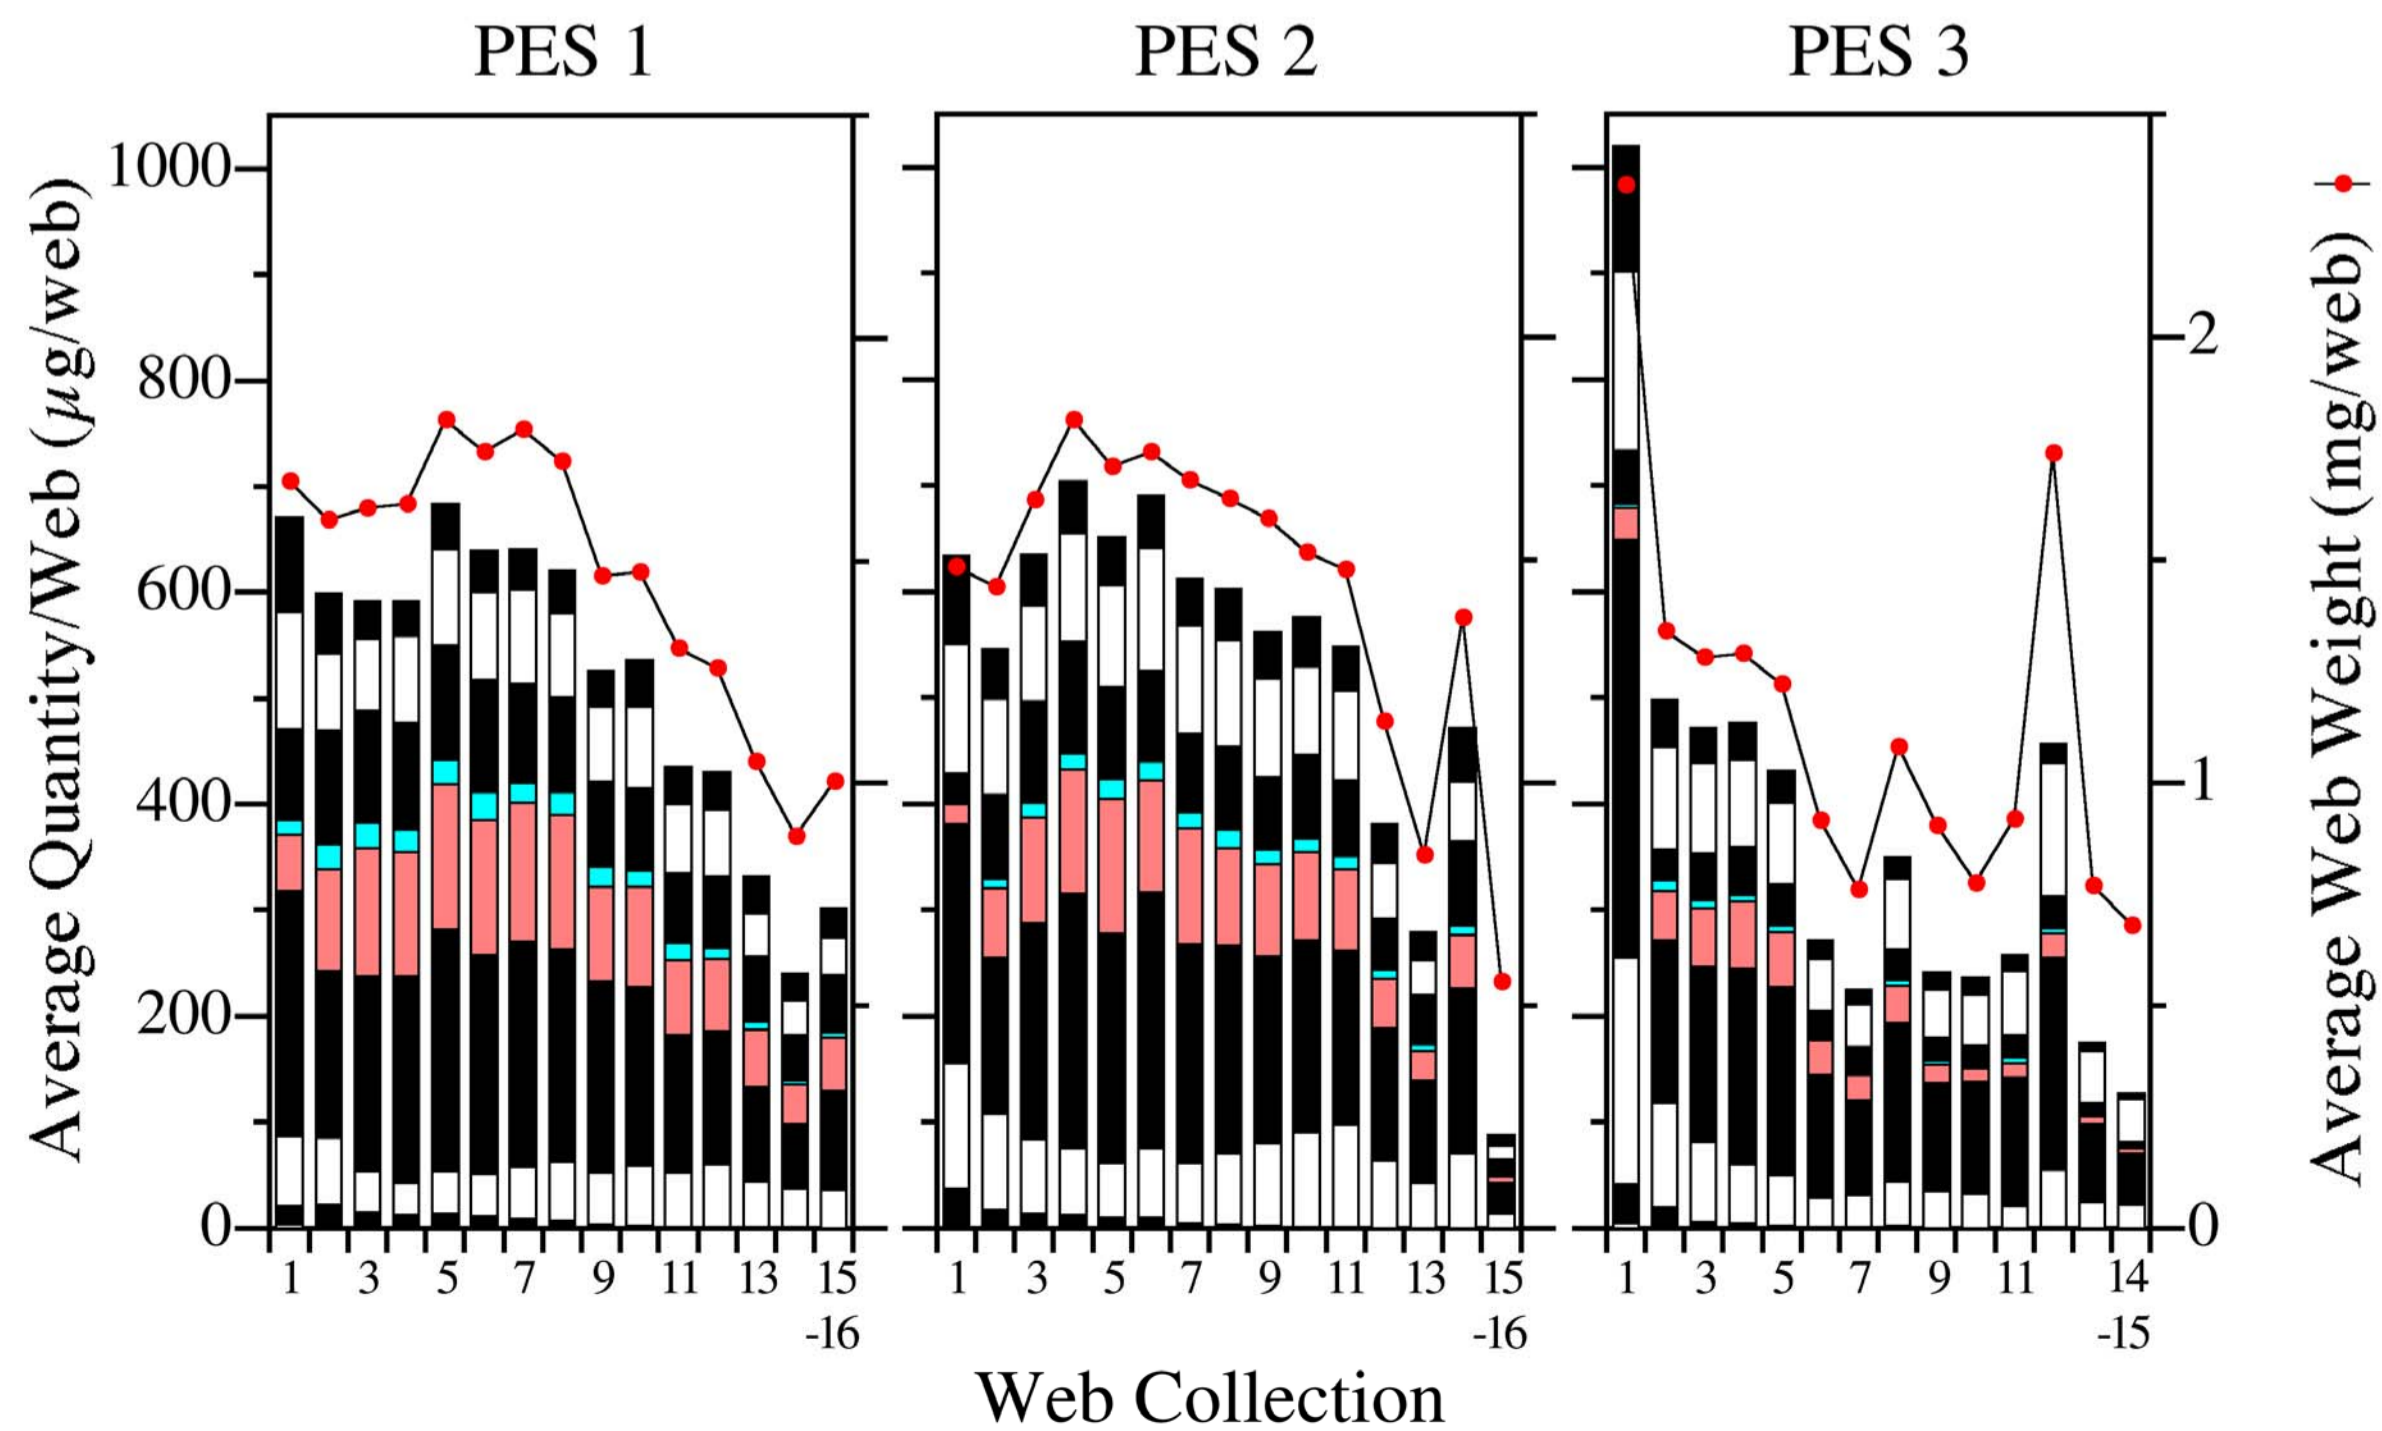

Supplement: jeb02147-sup-figs7.pdf [file jeb02147-sup-figs7.pdf]

*Araneus cavaticus*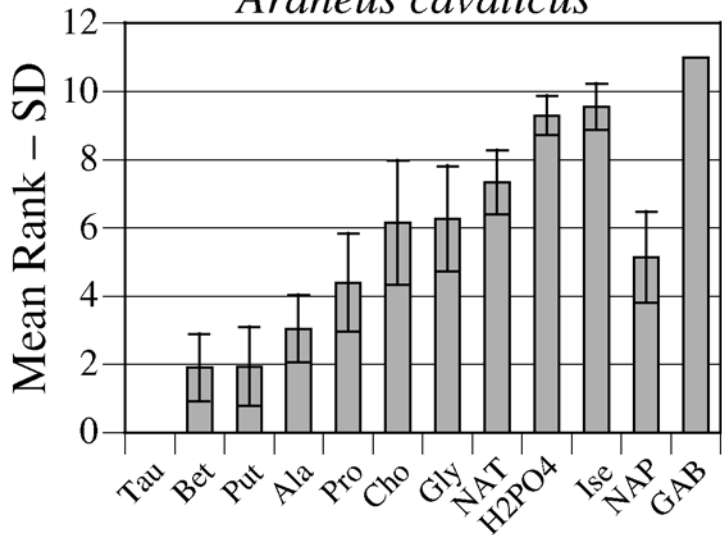*Argiope trifasciata*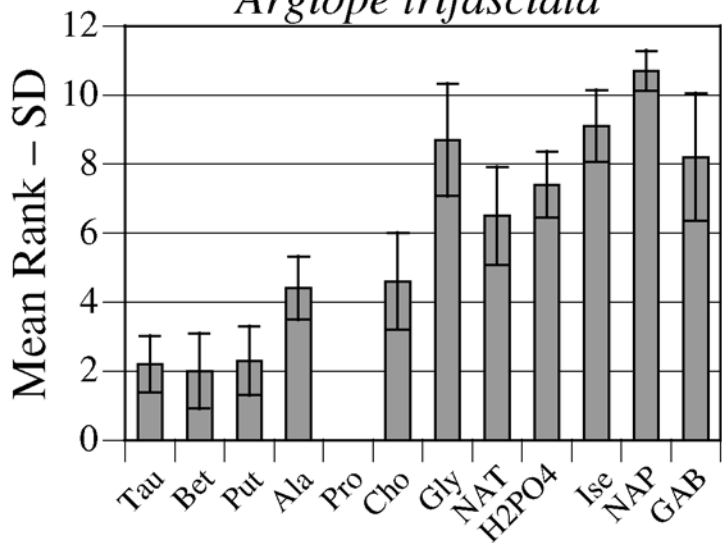*Argiope aurantia*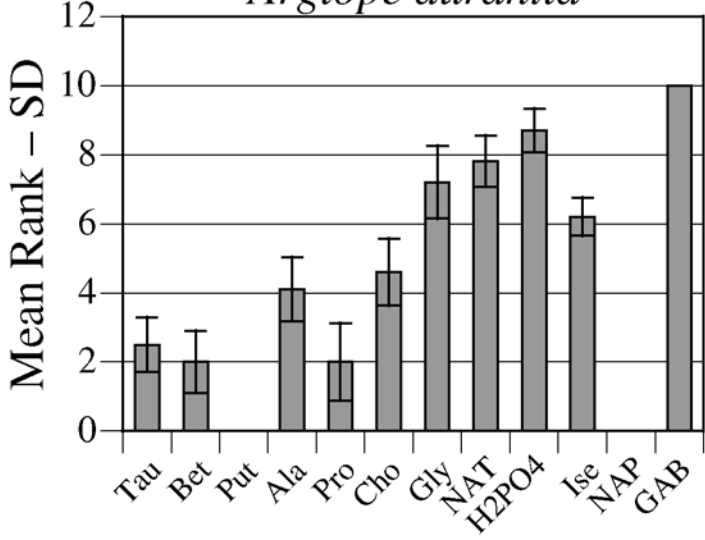

Supplement: jeb02147-sup-figs8.pdf [file jeb02147-sup-figs8.pdf]
